# Supplementary material
Source: publisher figshare collection journal article supplement (https://acs.figshare.com/ndownloader/files/4319335)
Supplement: Supplementary file 1 [file 4319335]

# Supporting information for: Diverse Structural and Magnetic Properties of Differently Prepared MnAs Nanoparticles

Peng Tian,<sup>†</sup> Yanhua Zhang,<sup>‡</sup> Keerthi Senevirathne,<sup>‡</sup> Stephanie L. Brock,<sup>\*,‡</sup>

Ambesh Dixit,<sup>¶</sup> Gavin Lawes,<sup>¶</sup> and Simon J. L. Billinge<sup>\*,§,||</sup>

*Department of Physics and Astronomy, Michigan State University, East Lansing, MI 48824,  
Department of Chemistry, Wayne State University, Detroit, MI 48202, Department of Physics,  
Wayne State University, Detroit, MI 48201, Department of Applied Physics and Applied  
Mathematics, Columbia University, New York, NY 10027, and Department of Condensed Matter  
Physics and Materials Science, Brookhaven National Laboratory, Upton, NY 11973*

E-mail: sbrock@chem.wayne.edu; sb2896@columbia.edu

---

\*To whom correspondence should be addressed

<sup>†</sup>Michigan State University

<sup>‡</sup>Wayne State University

<sup>¶</sup>Wayne State University

<sup>§</sup>Columbia University

<sup>||</sup>Brookhaven National Laboratory

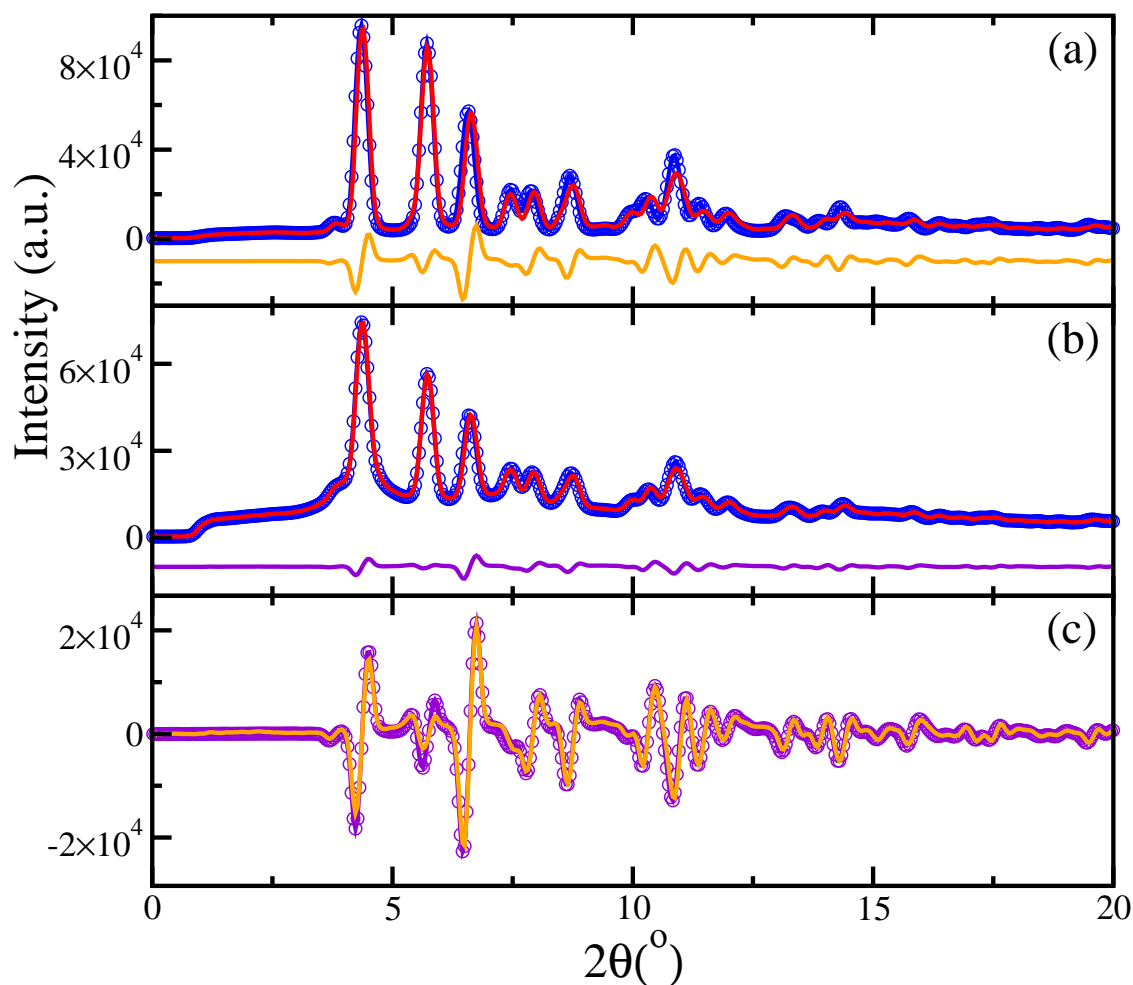

Figure 1: (a) comparison of the difference (orange curve) between 295 (blue line) and 335 K (red line) diffraction pattern for bulk MnAs. (b) same as (a) but for type-A nanoparticles with violet-colored difference curve. (c) comparison of the difference curves from (a) and (b). The orange is the same as the difference curve in (a) and the violet is the result of scaling the curve in (b) by a factor of 4 for comparison.

## Graphical TOC Entry

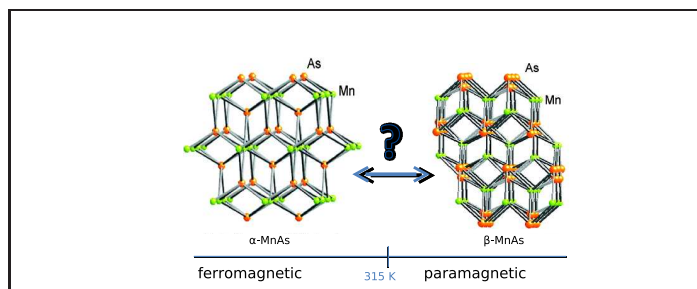

[tbh]

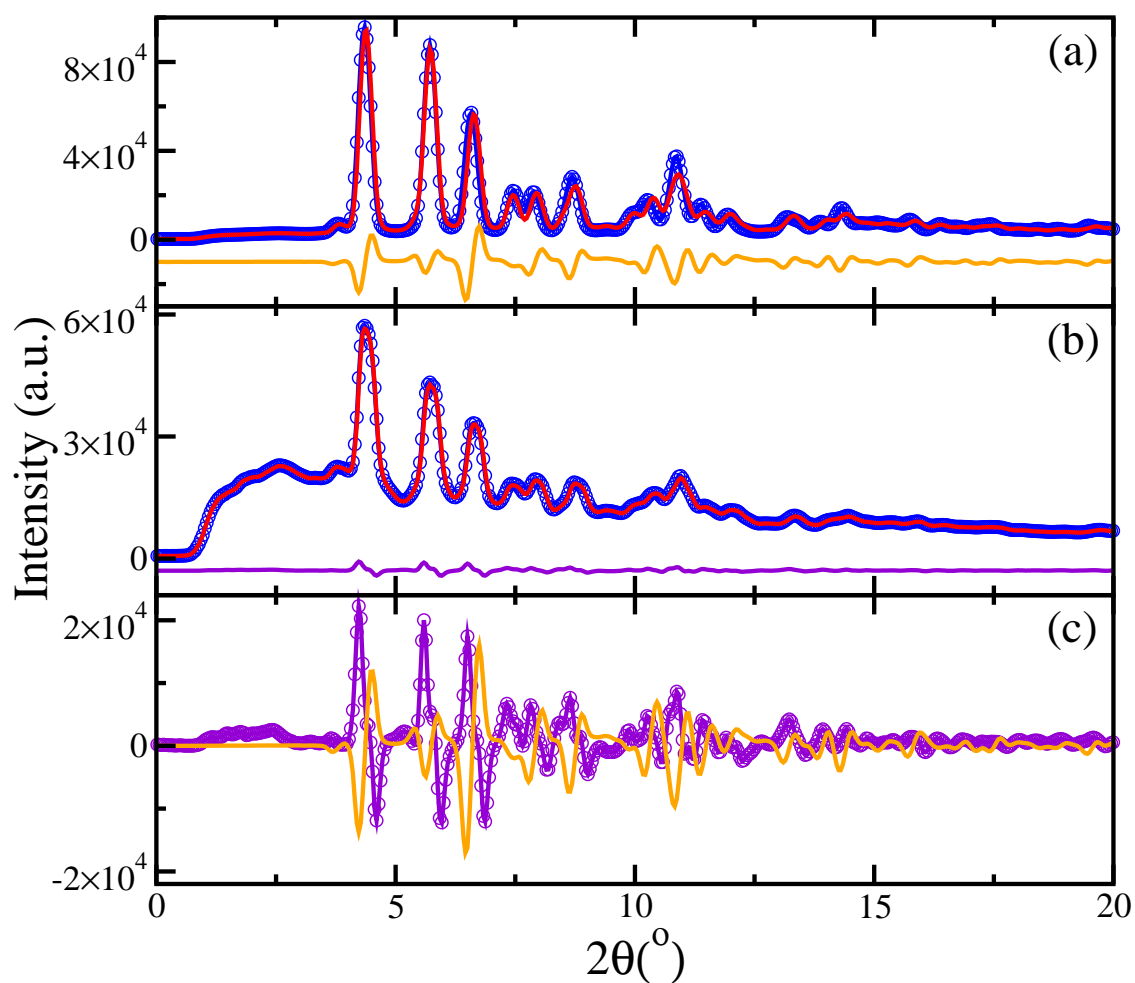

Figure 2: Same as Figure 1 but for type-B nanoparticles. In (c) the difference curve (violet) of type-B nanoparticles is scaled by a factor of 10 since its amplitude is too small to compare with the bulk one.
